# Supplementary material
Source: publisher site journal article supplement (https://www.dovepress.com/article/397051)
Supplement: Supplementary file 1 [file get_supplementary_file.php]

**Emerging prevalence and clinical features of *Elizabethkingia meningoseptica* infection in Southwest China: A 9-year retrospective study and systematic review**

Siyuan Ma, Yali Gong, Xiaoqiang Luo, Yuan Peng, Cheng Zhang, Xiaorong Zhang, Xiaohong Hu, Peng Tang, Zhiqiang Yuan, Gaoxing Luo and Haisheng Li

**Supplementary Materials**

**Supplementary Table S1. Assignment of the collected 18 factors in the Logistic regression analysis of mortality**

| <b>Risk factors</b>              | <b>Variables</b> | <b>Evaluation</b>      |
|----------------------------------|------------------|------------------------|
| Gender                           | X1               | Male=1, Female=0       |
| Ages                             | X2               |                        |
| Basic condition                  | X3               | Unhealthy=1, Healthy=0 |
| Operation                        | X4               | Yes=1, No=0            |
| Mechanical ventilation           | X5               | Yes=1, No=0            |
| CVCs                             | X6               | Yes=1, No=0            |
| Numbers of coinfecting pathogens | X7               | 0=0, 1=1, 2=2, >2=3    |
| Diagnosis days                   | X8               |                        |
| Nervous system disease           | X9               | Yes=1, No=0            |
| Tumor                            | X10              | Yes=1, No=0            |
| Trauma                           | X11              | Yes=1, No=0            |
| Respiratory disease              | X12              | Yes=1, No=0            |
| Fungal infection                 | X13              | Yes=1, No=0            |
| Abnormal WBC count               | X14              | Yes=1, No=0            |
| Abnormal neutrophil percentage   | X15              | Yes=1, No=0            |
| Abnormal Platelet                | X16              | Yes=1, No=0            |
| Abnormal Lymphocyte percentage   | X17              | Yes=1, No=0            |
| Abnormal Lymphocyte count        | X18              | Yes=1, No=0            |
| Death                            | Y                | Yes=1, No=0            |

**Supplementary Table S2. Assignment of the collected 16 factors in the Logistic regression analysis of infection**

| <b>Risk factors</b>                       | <b>Variables</b> | <b>Evaluation</b>   |
|-------------------------------------------|------------------|---------------------|
| Gender                                    | X1               | Male=1, Female=0    |
| Ages                                      | X2               |                     |
| Operation                                 | X3               | Yes=1, No=0         |
| Mechanical ventilation                    | X4               | Yes=1, No=0         |
| CVCs                                      | X5               | Yes=1, No=0         |
| Numbers of coinfecting pathogens          | X6               | 0=0, 1=1, 2=2, >2=3 |
| Nervous system disease                    | X7               | Yes=1, No=0         |
| Tumor                                     | X8               | Yes=1, No=0         |
| Trauma                                    | X9               | Yes=1, No=0         |
| Respiratory disease                       | X10              | Yes=1, No=0         |
| Fungal infection                          | X11              | Yes=1, No=0         |
| Exposure to $\beta$ -lactamase inhibitors | X12              | Yes=1, No=0         |
| Exposure to Carbapenem                    | X13              | Yes=1, No=0         |
| Exposure to Tigecycline                   | X14              | Yes=1, No=0         |
| Exposure to Fluoroquinolone               | X15              | Yes=1, No=0         |
| Exposure to antifungal drugs              | X16              | Yes=1, No=0         |
| Infection                                 | Y                | Yes=1, No=0         |

Supplementary Table S3. The distribution of 150 pathogens co-existed with *E. meningoseptica*

| Pathogens                     | No.        | Percentage (%) |
|-------------------------------|------------|----------------|
| <b>Gram positive bacteria</b> | <b>29</b>  | <b>19.3</b>    |
| <i>S. aureus</i>              | 12         | 8.0            |
| <i>S. epidermidis</i>         | 7          | 4.7            |
| <i>E. faecium</i>             | 3          | 2.0            |
| <i>S. hominis</i>             | 3          | 2.0            |
| <i>S. haemolyticus</i>        | 1          | 0.7            |
| <i>E. faecalis</i>            | 1          | 0.7            |
| <i>E. gallinarum</i>          | 1          | 0.7            |
| <i>L. mesenteroides</i>       | 1          | 0.7            |
| <b>Gram negative bacteria</b> | <b>109</b> | <b>72.7</b>    |
| <i>K. pneumoniae</i>          | 23         | 15.3           |
| <i>A. baumannii</i>           | 21         | 14.0           |
| <i>P. aeruginosa</i>          | 15         | 10.0           |
| <i>S. maltophilia</i>         | 8          | 5.3            |
| <i>E. cloacae</i>             | 7          | 4.7            |
| <i>E. coli</i>                | 7          | 4.7            |
| <i>H. influenzae</i>          | 4          | 2.7            |
| <i>A. loffei</i>              | 4          | 2.7            |
| <i>E. aerogenes</i>           | 2          | 1.3            |
| <i>M. morgani</i>             | 2          | 1.3            |
| <i>S. marcescens</i>          | 2          | 1.3            |
| <i>P. mirabilis</i>           | 2          | 1.3            |
| <i>Others</i>                 | 12         | 8.0            |
| <b>Fungi</b>                  | <b>12</b>  | <b>8.0</b>     |
| <i>C. albicans</i>            | 5          | 3.3            |
| <i>C. tropicalis</i>          | 3          | 2.0            |
| <i>C. glabrata</i>            | 2          | 1.3            |
| <i>C. parapsilosis</i>        | 1          | 0.7            |
| <i>A. flavus</i>              | 1          | 0.7            |

**Supplementary Table S4. Quality assessment by JBI method**

| NO. | Author(year)                                 | Was the sample frame appropriate to address the target population? | Were study participants sampled in an appropriate way? | Was the sample size adequate? | Were the study subjects and the setting described in detail? | Was the data analysis conducted with sufficient coverage of the identified sample? | Were valid methods used for the identification of the condition? | Was the condition measured in a standard, reliable way for all participants? | Was the appropriate statistical analysis? | Was the response rate adequate, and if not, was the low response rate managed appropriately? | Include |
|-----|----------------------------------------------|--------------------------------------------------------------------|--------------------------------------------------------|-------------------------------|--------------------------------------------------------------|------------------------------------------------------------------------------------|------------------------------------------------------------------|------------------------------------------------------------------------------|-------------------------------------------|----------------------------------------------------------------------------------------------|---------|
| 1   | Lin, Y.T., et al.(2009) <sup>14</sup>        | Yes                                                                | Yes                                                    | Yes                           | Yes                                                          | Yes                                                                                | Yes                                                              | Yes                                                                          | Yes                                       | Yes                                                                                          | Yes     |
| 2   | Hsu, M.S., et al. (2011) <sup>15</sup>       | Yes                                                                | Yes                                                    | Yes                           | Yes                                                          | Yes                                                                                | Yes                                                              | Yes                                                                          | Yes                                       | Yes                                                                                          | Yes     |
| 3   | Issack, M.I. , et al. (2011) <sup>23*</sup>  | Yes                                                                | Yes                                                    | No                            | Yes                                                          | No                                                                                 | No                                                               | No                                                                           | No                                        | Yes                                                                                          | No      |
| 4   | Pereira, G.H., et al.(2013) <sup>24</sup>    | Yes                                                                | Yes                                                    | No                            | Yes                                                          | Yes                                                                                | Yes                                                              | Yes                                                                          | No                                        | Yes                                                                                          | Yes     |
| 5   | Ratnamani, M., et al. (2013) <sup>19</sup>   | Yes                                                                | Yes                                                    | No                            | Yes                                                          | Yes                                                                                | Yes                                                              | Yes                                                                          | No                                        | Yes                                                                                          | Yes     |
| 6   | Chang, Y.C., et al.(2014) <sup>16</sup>      | Yes                                                                | Yes                                                    | Yes                           | Yes                                                          | Yes                                                                                | Yes                                                              | Yes                                                                          | Yes                                       | Yes                                                                                          | Yes     |
| 7   | Ann, S.Y., et al.(2015) <sup>11</sup>        | Yes                                                                | Yes                                                    | Yes                           | Yes                                                          | Yes                                                                                | Yes                                                              | Yes                                                                          | Yes                                       | Yes                                                                                          | Yes     |
| 8   | Moore, L.S.P., et al.(2016) <sup>25</sup>    | Yes                                                                | Yes                                                    | Yes                           | Yes                                                          | Yes                                                                                | Yes                                                              | Yes                                                                          | No                                        | Yes                                                                                          | Yes     |
| 9   | Rastogi, N., et al.(2016) <sup>20</sup>      | Yes                                                                | Yes                                                    | Yes                           | Yes                                                          | Yes                                                                                | Yes                                                              | Yes                                                                          | No                                        | Yes                                                                                          | Yes     |
| 10  | Huang, Y.C., et al. (2017) <sup>8</sup>      | Yes                                                                | Yes                                                    | Yes                           | Yes                                                          | Yes                                                                                | Yes                                                              | Yes                                                                          | Yes                                       | Yes                                                                                          | Yes     |
| 11  | Lin, J.N., et al.(2018) <sup>17</sup>        | Yes                                                                | Yes                                                    | Yes                           | Yes                                                          | Yes                                                                                | Yes                                                              | Yes                                                                          | Yes                                       | Yes                                                                                          | Yes     |
| 12  | Chan, J.C., et al.(2019) <sup>18</sup>       | Yes                                                                | Yes                                                    | No                            | Yes                                                          | Yes                                                                                | Yes                                                              | Yes                                                                          | No                                        | Yes                                                                                          | Yes     |
| 13  | Pindi, G., et al.(2019) <sup>21</sup>        | Yes                                                                | Yes                                                    | Yes                           | Yes                                                          | Yes                                                                                | Yes                                                              | Yes                                                                          | Yes                                       | Yes                                                                                          | Yes     |
| 14  | Umair, A. , et al.(2021) <sup>26</sup>       | Yes                                                                | Yes                                                    | No                            | Yes                                                          | Yes                                                                                | Yes                                                              | Yes                                                                          | Yes                                       | Yes                                                                                          | Yes     |
| 15  | Erinmez, M., A. , et al. (2021) <sup>9</sup> | Yes                                                                | Yes                                                    | No                            | Yes                                                          | Yes                                                                                | Yes                                                              | Yes                                                                          | No                                        | Yes                                                                                          | Yes     |

|    |                                         |     |     |    |     |     |     |     |    |     |     |
|----|-----------------------------------------|-----|-----|----|-----|-----|-----|-----|----|-----|-----|
| 16 | Saygılı, N., et al.(2021) <sup>22</sup> | Yes | Yes | No | Yes | Yes | Yes | Yes | No | Yes | Yes |
|----|-----------------------------------------|-----|-----|----|-----|-----|-----|-----|----|-----|-----|

---

\*Excluded studies with a JBI score of less than 7

**Supplementary Table S5. Infection features and clinical treatment of included studies reporting E.meningoseptica infection**

| Author(Year)                              | Identification Methods                                   | Pathogen sources                                                       | Antimicrobial susceptibility(sensitivity%)                                                                                                                                                                                                                                                                          | Treatment                                                                                                                                                                                                                                                                       |
|-------------------------------------------|----------------------------------------------------------|------------------------------------------------------------------------|---------------------------------------------------------------------------------------------------------------------------------------------------------------------------------------------------------------------------------------------------------------------------------------------------------------------|---------------------------------------------------------------------------------------------------------------------------------------------------------------------------------------------------------------------------------------------------------------------------------|
| Lin, Y.T., et al.(2009) <sup>14</sup>     | VITEK 2 system                                           | Blood (100%)                                                           | Levofloxacin (63%), ciprofloxacin (66%), tigecycline(84%), piperacillin-tazobactam (91%), and trimethoprim-sulfamethoxazole (97%). other b-lactam antibiotics(0), colistin(0), vancomycin(0), and aminoglycosides(0).                                                                                               | Not reported                                                                                                                                                                                                                                                                    |
| Hsu, M.S., et al. (2011) <sup>15</sup>    | VITEK GNI system and/or Phoenix system                   | Blood(77.8%), Respiratory tract(9.4%), soft tissue and catheter (6.1%) | Piperacillin-tazobactam(79%), fluoroquinolones had low MICs, all anti-pseudomonas cephalosporins, all carbapenems, and aminoglycosides had high MICs                                                                                                                                                                | Mono-therapy: Anti-pseudomonal penicillins(28.8%),Fluoroquinolones (25.4%), Anti-pseudomonal Cephalosporins(8.5%), Carbapenems(5.9%), Aminoglycosides (1.7%) Combination therapy:Anti pseudomonal penicillins with fluoroquinolone(59.3%), Carbapenem with aminoglycoside(1.7%) |
| Issack, M.I., et al. (2011) <sup>23</sup> | Positive cytochrome oxidase reaction and API 20NE System | Cerebrospinal fluid (100%)                                             | All were susceptible to piperacillin, piperacillin/tazobactam, vancomycin and rifampicin. All were resistant to cefalexin, ceftazidime, cefotaxime, ceftriaxone, gentamicin, amikacin, tetracycline, colistin and meropenem. They had intermediate susceptibility to ciprofloxacin and amoxicillin/clavulanic acid. | All were intravenous piperacillin (100 mg/kg every 8 hours) and oral rifampicin (10 mg/kg every 12 hours)                                                                                                                                                                       |
| Pereira, G.H., et al.(2013) <sup>24</sup> | VITEK system, Classical phenotypic                       | Blood(66.7%), respiratory tract(33.3%)                                 | Not reported                                                                                                                                                                                                                                                                                                        | Vancomycin(4/9), vancomycin combined with rifampin or ciprofloxacin(2/9), trimethoprim/sulfamethoxazole and teicoplanin(1/9),none(2/9)                                                                                                                                          |

|                                                  |                                                           |                                                                                |                                                                                                                                     |                                                                                 |
|--------------------------------------------------|-----------------------------------------------------------|--------------------------------------------------------------------------------|-------------------------------------------------------------------------------------------------------------------------------------|---------------------------------------------------------------------------------|
|                                                  | methods and<br>API 20 NE<br>System                        |                                                                                |                                                                                                                                     |                                                                                 |
| Ratnamani,<br>M., et al.<br>(2013) <sup>19</sup> | VITEK 2<br>Compact<br>automated<br>system                 | Blood(75%),<br>respiratory<br>tract(25%)                                       | Not reported                                                                                                                        | Piperacillin tazobactam(6/8),Piperacillin tazobactam with<br>Ciprofloxacin(2/8) |
| Chang,<br>Y.C., et<br>al.(2014) <sup>16</sup>    | 16S rRNA<br>gene<br>sequencing                            | Blood (48.7%),<br>sputum (41.0%),<br>urine(5.1%),<br>CVC(2.6%),<br>wound(2.6%) | Minocycline(100%),<br>trimethoprim/sulfamethoxazole(74.4%),<br>ciprofloxacin(35.9%), and cefepime(5.1%) with 100%<br>susceptibility | Not reported                                                                    |
| Ann, S.Y., et<br>al.(2015) <sup>11</sup>         | VITEK2<br>system                                          | Sputum<br>(23,76.7%),<br>Catheter (16.7%),<br>Blood (3.3%),<br>Urine (3.3%)    | Minocycline (90%) ,levofloxacin (66.7%) , ciprofloxacin<br>(60%),Piperacillin/tazobactam(20%)                                       | Not reported                                                                    |
| Moore,<br>L.S.P., et<br>al.(2016) <sup>25</sup>  | API and<br>Biotyper<br>MALDI-<br>TOF mass<br>spectroscopy | Respiratory<br>tract(73.3%),<br>blood(3.3%),<br>unknown(23.3%)                 | Susceptible to piperacillin-tazobactam and<br>trimethoprim-sulfamethoxazole                                                         | Trimethoprim/sulfamethoxazole(5/30),tigecycline(6/30),N<br>one(19/30)           |
| Rastogi, N.,<br>et<br>al.(2016) <sup>20</sup>    | Vitek 2<br>system                                         | Bronchoalveolar<br>lavage fluid<br>(70%) , blood<br>(22%),                     | Tigecycline(100%), Piperacillin–tazobactam<br>(95.23%) ,Trimethoprim–sulphamethoxazole<br>(14.3%),Ciprofloxacin (19.1%)             | Not reported                                                                    |



|                                         |                                                                                                                                    |                                                                                                |                                                                                                                                                                         |                                                                                                                                                                    |
|-----------------------------------------|------------------------------------------------------------------------------------------------------------------------------------|------------------------------------------------------------------------------------------------|-------------------------------------------------------------------------------------------------------------------------------------------------------------------------|--------------------------------------------------------------------------------------------------------------------------------------------------------------------|
|                                         |                                                                                                                                    | cerebrospinal fluid (4%)                                                                       |                                                                                                                                                                         |                                                                                                                                                                    |
| Huang, Y.C., et al. (2017) <sup>8</sup> | VITEK 2 Compact automated system, MA LDI-TOF-MS.                                                                                   | Blood (100%)                                                                                   | Minocycline (100%), Piperacillin/tazobactam (95.7%), sulfamethoxazole/trimethoprim (97.8%), tigecycline (90.3%), ciprofloxacin (34.4%). Cefepime (21.5%), vancomycin(0) | Not reported                                                                                                                                                       |
| Lin, J.N., et al.(2018) <sup>17</sup>   | The API/ID32 Phenotyping Kits and VITEK MS System. The species of Elizabethkingia was reidentified using 16S rRNA gene sequencing. | Blood(70%), Cerebrospinal fluid(10%), respiratory tract(5%), catheter(5%), bile(5%), urine(5%) | Minocycline (60%), levofloxacin (30%), piperacillin (15%), and tigecycline (15%)                                                                                        | $\beta$ -lactams(44.6%), $\beta$ -lactam/lactamase inhibitors(21.7%),Ciprofloxacin(10.9%), Levofloxacin(26.1%)                                                     |
| Chan, J.C., et al.(2019) <sup>18</sup>  | VITEK mass spectrometry system or                                                                                                  | Blood (100%), Cerebrospinal fluid (30.8%).                                                     | Piperacillin/tazobactam(100%), trimethoprim/sulfamethoxazole (78.6 %), ciprofloxacin(33.3%); moxifloxacin(87.5%), levofloxacin(87.5%)                                   | Piperacillin/tazobactam with trimethoprim/sulfamethoxazole (6/13), piperacillin/tazobactam with a fluoroquinolone (4/13). minocycline, clindamycin and rifampicin. |

|                                              |                                                 |                                                                                          |                                                                                                                           |                                                                                                                                          |
|----------------------------------------------|-------------------------------------------------|------------------------------------------------------------------------------------------|---------------------------------------------------------------------------------------------------------------------------|------------------------------------------------------------------------------------------------------------------------------------------|
| Pindi, G., et al.(2019) <sup>21</sup>        | MALDI-TOF-MS. VITEK2 system                     | Respiratory tract(87.5%), blood (6.25%), CVC(3.12%), bile(3.12%)                         | Minocycline (100%), cotrimoxazole (65.6 %), Levofloxacin (53.12%), cefoperazone-sulbactam(46.8%), ciprofloxacin(43.75% )  | Not reported                                                                                                                             |
| Umair, A. , et al.(2021) <sup>26</sup>       | VITEK 2 system                                  | Blood(61.5%), Cerebrospinal fluid(15.4%), Respiratory tract(15.4%), urine(7.7%)          | Most Susceptible to trimethoprim-sulfamethoxazole,levofloxacin, ciprofloxacin and minocycline                             | Quinolone(5/13), cotrimoxazole(4/13), minocycline(4/13)                                                                                  |
| Erinmez, M., A. , et al. (2021) <sup>9</sup> | MALDI-TOF MS                                    | Tracheal aspirates (50%), blood (31%), catheter (12%) , cerebrospinal fluid(6%)          | levofloxacin(100%), ciprofloxacin(100%), vancomycin(83.3%), trimethoprim-sulfamethoxazole(50%)                            | Colistin(4/6), Meropenem(6/6), vancomycin(4/6), amikacin(4/6), clarithromycin(2/6), linezolid(1/6), amphotercin B(1/6), Teicoplanin(1/6) |
| Saygılı, N., et al.(2021) <sup>22</sup>      | VITEK 2 Compact automated system, MALDI-TOF-MS. | Blood(47.1%), endotracheal aspirate(35.3%), cerebrospinal fluid(11.8%), wound swab(5.9%) | Cefoperazone/sulbactam(35.3%), ciprofloxacin(70.6%) , trimethoprim/sulfamethoxazole(58.3%) ,Piperacillintazo bactam(8.3%) | Not reported                                                                                                                             |

---
